# Supplementary material for: Brain structural impairment in spinocerebellar ataxia type 6: not restricted to the cerebellum
Source: Research Square preprint supplement (doi:10.21203/rs.3.rs-6907975/v1), 2025-07-02
Supplement: Supplementary file 1 [file e3b577699c911bd3d8d38735.xlsx]

## Sheet: Cortical Thickness Left
Structures	Controls (mean±SD)	SCA6 (mean±SD)	p-value (Uncorrected)	Bonferroni	FDR	Effect Size (Cohen d)
caudalanteriorcingulate	2.434 ± 0.162	2.415 ± 0.118	0.5601	1	1	0.1341
caudalmiddlefrontal	2.401 ± 0.113	2.345 ± 0.163	0.684291	1	1	0.397875
cuneus	1.901 ± 0.107	1.831 ± 0.102	0.091329	1	1	0.672255
entorhinal	3.216 ± 0.317	3.215 ± 0.358	0.819607	1	1	0.00314469
fusiform	2.620 ± 0.122	2.607 ± 0.135	0.875724	1	1	0.0985678
inferiorparietal	2.320 ± 0.085	2.288 ± 0.124	0.611843	1	1	0.300677
inferiortemporal	2.771 ± 0.159	2.636 ± 0.156	0.0279371	0.866049	1	0.860618
insula	2.991 ± 0.153	2.910 ± 0.105	0.148316	1	1	0.615977
isthmuscingulate	2.214 ± 0.102	2.204 ± 0.116	0.977277	1	1	0.0910924
lateraloccipital	2.098 ± 0.103	2.105 ± 0.140	0.347817	1	1	0.0564984
lateralorbitofrontal	2.515 ± 0.092	2.486 ± 0.082	0.442722	1	1	0.341914
lingual	1.907 ± 0.093	1.879 ± 0.118	0.30977	1	1	0.262729
medialorbitofrontal	2.367 ± 0.099	2.292 ± 0.089	0.146543	1	1	0.795576
middletemporal	2.631 ± 0.078	2.549 ± 0.091	0.0296941	0.920518	1	0.975278
paracentral	2.388 ± 0.112	2.398 ± 0.100	0.613812	1	1	0.0943924
parahippocampal	2.693 ± 0.275	2.625 ± 0.264	0.116727	1	1	0.250867
parsopercularis	2.502 ± 0.093	2.436 ± 0.098	0.116813	1	1	0.694076
parsorbitalis	2.612 ± 0.138	2.554 ± 0.123	0.64746	1	1	0.445989
parstriangularis	2.338 ± 0.109	2.237 ± 0.159	0.0189685	0.588023	1	0.742859
pericalcarine	1.559 ± 0.097	1.518 ± 0.108	0.513516	1	1	0.399212
postcentral	2.025 ± 0.064	1.964 ± 0.139	0.375217	1	1	0.56524
posteriorcingulate	2.314 ± 0.111	2.326 ± 0.234	0.446165	1	1	0.066432
precentral	2.497 ± 0.094	2.420 ± 0.095	0.0918929	1	1	0.819904
precuneus	2.344 ± 0.094	2.295 ± 0.083	0.200277	1	1	0.557758
rostralanteriorcingulate	2.574 ± 0.185	2.516 ± 0.188	0.296825	1	1	0.308259
rostralmiddlefrontal	2.274 ± 0.105	2.229 ± 0.212	0.653688	1	1	0.266685
superiorfrontal	2.492 ± 0.102	2.456 ± 0.106	0.40672	1	1	0.343172
superiorparietal	2.119 ± 0.125	2.093 ± 0.111	0.77477	1	1	0.216375
superiortemporal	2.715 ± 0.163	2.634 ± 0.063	0.198444	1	1	0.654854
supramarginal	2.428 ± 0.106	2.381 ± 0.072	0.166671	1	1	0.518369
transversetemporal	2.230 ± 0.281	2.224 ± 0.415	0.567981	1	1	0.0167665

## Sheet: Cortical Thickness Right
Structures	Controls (mean±SD)	SCA6 (mean±SD)	p-value (Uncorrected)	Bonferroni	FDR	Effect Size (Cohen d)
caudalanteriorcingulate	2.259 ± 0.196	2.202 ± 0.194	0.31788	1	1	0.292669
caudalmiddlefrontal	2.400 ± 0.115	2.388 ± 0.172	0.601629	1	1	0.0860016
cuneus	1.837 ± 0.115	1.800 ± 0.089	0.851302	1	1	0.359547
entorhinal	3.314 ± 0.326	3.272 ± 0.384	0.46892	1	1	0.117309
fusiform	2.623 ± 0.080	2.615 ± 0.125	0.948017	1	1	0.0851059
inferiorparietal	2.308 ± 0.078	2.284 ± 0.084	0.61563	1	1	0.291766
inferiortemporal	2.741 ± 0.135	2.703 ± 0.138	0.582249	1	1	0.277437
insula	2.963 ± 0.147	2.939 ± 0.147	0.926474	1	1	0.163446
isthmuscingulate	2.178 ± 0.110	2.145 ± 0.192	0.734369	1	1	0.209465
lateraloccipital	2.097 ± 0.089	2.102 ± 0.095	0.498451	1	1	0.060519
lateralorbitofrontal	2.464 ± 0.090	2.424 ± 0.081	0.375784	1	1	0.471648
lingual	1.958 ± 0.106	1.943 ± 0.081	0.589698	1	1	0.158979
medialorbitofrontal	2.384 ± 0.133	2.332 ± 0.109	0.56629	1	1	0.425933
middletemporal	2.731 ± 0.113	2.633 ± 0.089	0.0299477	0.92838	1	0.959869
paracentral	2.377 ± 0.136	2.342 ± 0.108	0.476879	1	1	0.279366
parahippocampal	2.625 ± 0.245	2.596 ± 0.165	0.553961	1	1	0.137778
parsopercularis	2.466 ± 0.099	2.402 ± 0.100	0.260596	1	1	0.645828
parsorbitalis	2.582 ± 0.131	2.438 ± 0.134	0.0178389	0.553006	1	1.08764
parstriangularis	2.335 ± 0.101	2.326 ± 0.166	0.799096	1	1	0.0668949
pericalcarine	1.604 ± 0.113	1.529 ± 0.146	0.377688	1	1	0.569211
postcentral	2.015 ± 0.081	1.925 ± 0.099	0.0576511	1	1	0.996701
posteriorcingulate	2.274 ± 0.085	2.282 ± 0.256	0.613737	1	1	0.0436005
precentral	2.468 ± 0.153	2.397 ± 0.092	0.303224	1	1	0.562732
precuneus	2.257 ± 0.101	2.238 ± 0.067	0.612323	1	1	0.223296
rostralanteriorcingulate	2.610 ± 0.139	2.533 ± 0.134	0.111541	1	1	0.56475
rostralmiddlefrontal	2.270 ± 0.092	2.194 ± 0.124	0.147874	1	1	0.692241
superiorfrontal	2.501 ± 0.106	2.454 ± 0.091	0.285106	1	1	0.474976
superiorparietal	2.063 ± 0.119	2.055 ± 0.059	0.727613	1	1	0.0857141
superiortemporal	2.795 ± 0.121	2.718 ± 0.119	0.122771	1	1	0.636194
supramarginal	2.446 ± 0.103	2.369 ± 0.090	0.060079	1	1	0.794284
transversetemporal	2.345 ± 0.250	2.241 ± 0.327	0.691719	1	1	0.356102

## Sheet: Deep Gray Matter
Structures	Control (mean±SD)	SCA6 (mean±SD)	p-value (Uncorrected)	Bonferroni	FDR	Effect Size (Cohen d)
CC_Anterior	1038.125 ± 273.940	737.719 ± 154.611	0.00308771	0.0648418	0.236372	1.35058
CC_Central	666.750 ± 171.816	523.487 ± 168.013	0.0722882	1	0.922308	0.843091
CC_Mid_Anterior	537.531 ± 170.927	460.662 ± 132.599	0.20951	1	1	0.502515
CC_Mid_Posterior	524.956 ± 124.139	422.144 ± 114.407	0.108736	1	1	0.861275
CC_Posterior	1006.075 ± 148.605	851.488 ± 126.484	0.0133858	0.281103	0.415282	1.12029
Left_Accumbens_area	487.506 ± 81.629	409.812 ± 73.749	0.0288851	0.606588	0.552808	0.998779
Left_Amygdala	1637.781 ± 234.477	1621.075 ± 217.534	0.284407	1	1	0.0738678
Left_Caudate	3361.812 ± 523.970	3061.450 ± 472.870	0.187651	1	1	0.601839
Left_Hippocampus	3980.400 ± 515.475	3844.800 ± 444.611	0.26933	1	1	0.281708
Left_Pallidum	2013.331 ± 235.382	1817.913 ± 213.516	0.0681707	1	0.922308	0.86963
Left_Putamen	4606.262 ± 382.716	4468.181 ± 486.861	0.941239	1	1	0.315329
Left_Thalamus	6753.056 ± 810.405	6123.587 ± 762.029	0.197236	1	1	0.800251
Left_VentralDC	4007.162 ± 531.633	3744.513 ± 377.858	0.673623	1	1	0.569493
Right_Accumbens_area	526.444 ± 77.856	440.200 ± 82.455	0.0162744	0.341762	0.415282	1.07552
Right_Amygdala	1821.487 ± 226.932	1776.894 ± 282.724	0.746483	1	1	0.173956
Right_Caudate	3541.444 ± 537.906	3195.587 ± 499.375	0.226641	1	1	0.666391
Right_Hippocampus	4078.381 ± 536.585	3896.812 ± 540.752	0.523228	1	1	0.337067
Right_Pallidum	1919.438 ± 218.901	1788.444 ± 191.607	0.400711	1	1	0.636797
Right_Putamen	4652.944 ± 362.724	4456.837 ± 590.730	0.518942	1	1	0.400079
Right_Thalamus	6451.863 ± 790.220	5904.981 ± 709.303	0.360413	1	1	0.728347
Right_VentralDC	3928.875 ± 459.614	3710.581 ± 369.743	0.771055	1	1	0.523353

## Sheet: Brainstem
Structures	Controls (mean±SD)	SCA6 (mean±SD)	p-value (Uncorrected)	Bonferroni	FDR	Effect Size (Cohen d)
Medulla	4761.095 ± 638.694	4403.958 ± 436.637	0.403394	1	1	0.652812
Pons	14959.445 ± 2588.674	13804.681 ± 1272.173	0.765685	1	1	0.566181
SCP	242.118 ± 40.303	172.621 ± 30.663	2.09084e-05	0.000104542	0.000238705	1.94077
Midbrain	6384.616 ± 840.267	6020.550 ± 534.049	0.663945	1	1	0.517133
Whole_brainstem	26347.274 ± 3998.601	24401.810 ± 2107.189	0.603018	1	1	0.608715

## Sheet: Cerebellum
Structures	Controls (mean±SD)	SCA6 (mean±SD)	p-value (Uncorrected)	Bonferroni	FDR	Effect Size (Cohen d)
Left_Cerebellum_White_Matter	12623.066 ± 2074.875	8880.170 ± 1679.946	4.17459e-07	1.25238e-05	2.94307e-06	1.98271
Left_Cerebellum_Cortex	41384.771 ± 5416.682	25032.531 ± 7168.378	3.61782e-09	1.08535e-07	8.67188e-08	2.57386
Right_Cerebellum_White_Matter	12537.681 ± 2111.617	8749.668 ± 1628.447	1.86681e-07	5.60043e-06	1.53746e-06	2.00895
Right_Cerebellum_Cortex	41152.228 ± 4990.159	24694.078 ± 6801.507	1.3404e-09	4.0212e-08	4.01616e-08	2.75913
Cbm_Left_I_IV	2975.023 ± 386.591	1577.387 ± 366.191	1.19136e-11	3.57407e-10	1.42784e-09	3.71189
Cbm_Right_I_IV	2799.739 ± 409.131	1593.507 ± 291.927	3.76843e-10	1.13053e-08	1.50548e-08	3.39407
Cbm_Left_V	3039.151 ± 533.196	1749.564 ± 385.121	6.83531e-09	2.05059e-07	9.06728e-08	2.77277
Cbm_Right_V	3087.045 ± 480.428	1702.837 ± 445.542	2.42681e-10	7.28042e-09	1.45426e-08	2.98763
Cbm_Left_VI	6054.641 ± 1322.557	3515.219 ± 998.774	9.0178e-07	2.70534e-05	5.68831e-06	2.16693
Cbm_Vermis_VI	1349.434 ± 193.153	737.288 ± 250.404	5.50758e-09	1.65227e-07	8.85943e-08	2.73746
Cbm_Right_VI	6113.156 ± 1222.695	3354.003 ± 1000.848	1.60408e-07	4.81225e-06	1.47884e-06	2.4695
Cbm_Left_CrusI	9358.412 ± 1515.687	5628.533 ± 1730.109	1.99461e-07	5.98383e-06	1.53746e-06	2.29328
Cbm_Right_CrusI	9583.282 ± 1379.348	5503.793 ± 1573.842	7.56555e-09	2.26966e-07	9.06728e-08	2.7568
Cbm_Left_CrusII	5451.586 ± 1194.713	3439.820 ± 1410.457	0.000233586	0.00700757	0.00111981	1.53917
Cbm_Right_CrusII	5537.880 ± 1262.106	3755.947 ± 1575.001	0.00356625	0.106988	0.016439	1.24859
Cbm_Left_VIIb	4078.530 ± 558.725	2233.921 ± 937.392	6.04914e-07	1.81474e-05	4.02771e-06	2.39048
Cbm_Right_VIIb	3861.637 ± 529.194	2084.764 ± 812.284	2.05252e-07	6.15756e-06	1.53746e-06	2.59204
Cbm_Left_VIIIa	4469.154 ± 971.583	2800.545 ± 1123.643	5.35645e-05	0.00160694	0.000267487	1.5886
Cbm_Right_VIIIa	4301.945 ± 795.147	2575.680 ± 941.587	4.29958e-06	0.000128987	2.34229e-05	1.98091
Cbm_Left_VIIIb	3190.283 ± 453.121	2037.248 ± 418.417	5.9137e-09	1.77411e-07	8.85943e-08	2.64388
Cbm_Right_VIIIb	3177.730 ± 505.791	1946.092 ± 482.429	5.2925e-09	1.58775e-07	8.85943e-08	2.49194
Cbm_Left_IX	2305.051 ± 373.232	1820.547 ± 558.936	0.0472077	1	0.195098	1.01949
Cbm_Vermis_IX	814.100 ± 142.411	646.440 ± 168.461	0.0235076	0.705228	0.100621	1.07488
Cbm_Right_IX	2251.731 ± 359.290	1953.002 ± 464.041	0.110441	1	0.44121	0.719857
Cbm_Left_X	462.939 ± 52.953	229.748 ± 93.644	1.9918e-08	5.9754e-07	2.17015e-07	3.06548
Cbm_Vermis_X	346.257 ± 59.221	270.706 ± 69.235	0.0196171	0.588514	0.087078	1.17274
Cbm_Right_X	438.084 ± 43.420	224.452 ± 110.859	1.27592e-06	3.82776e-05	7.64592e-06	2.53757
Cbm_Vermis_VII	643.584 ± 134.638	320.737 ± 151.625	2.68278e-06	8.04835e-05	1.5311e-05	2.25163
Cbm_Vermis_VIII	1635.151 ± 247.146	1074.830 ± 364.256	1.98501e-05	0.000595502	0.000103436	1.80018
Cbm_Vermis	4788.525 ± 606.333	3050.001 ± 872.279	1.37168e-07	4.11503e-06	1.36996e-06	2.31442

## Sheet: Fractional Anisotropy 
Structures	Control (mean±SD)	SCA6 (mean±SD)	p-value (Uncorrected)	Bonferroni	FDR	Effect Size (Cohen d)
SUPERIORPARIETALGYRUSLeft_gm_	0.439 ± 0.041	0.469 ± 0.021	0.0868149	1	0.615164	0.911631
CINGULATEGYRUSLeft_gm_	0.355 ± 0.028	0.382 ± 0.010	0.00855192	0.940711	0.24564	1.2938
SUPERIORFRONTALGYRUSLeft_gm_	0.385 ± 0.031	0.407 ± 0.012	0.0661829	1	0.493016	0.935717
MIDDLEFRONTALGYRUSLeft_gm_	0.375 ± 0.034	0.402 ± 0.013	0.0525947	1	0.447351	1.02835
INFERIORFRONTALGYRUSLeft_gm_	0.397 ± 0.039	0.429 ± 0.016	0.0413364	1	0.420611	1.06613
PRECENTRALGYRUSLeft_gm_	0.427 ± 0.038	0.456 ± 0.013	0.0440111	1	0.420611	1.0293
POSTCENTRALGYRUSLeft_gm_	0.406 ± 0.043	0.440 ± 0.016	0.0328311	1	0.370018	1.05932
ANGULARGYRUSLeft_gm_	0.395 ± 0.042	0.425 ± 0.024	0.144857	1	0.868845	0.851061
PRE_CUNEUSLeft_gm_	0.368 ± 0.032	0.389 ± 0.017	0.107192	1	0.732747	0.818338
CUNEUSLeft_gm_	0.379 ± 0.042	0.414 ± 0.019	0.0268664	1	0.361112	1.06816
LINGUALGYRUSLeft_gm_	0.376 ± 0.037	0.412 ± 0.016	0.00625629	0.688191	0.218604	1.2775
FUSIFORMGYRUSLeft_gm_	0.358 ± 0.027	0.388 ± 0.009	0.00164803	0.181283	0.170858	1.52611
PARAHIPPOCAMPALGYRUSLeft_gm_	0.365 ± 0.047	0.387 ± 0.019	0.258949	1	1	0.612826
SUPERIOROCCIPITALGYRUSLeft_gm_	0.410 ± 0.047	0.439 ± 0.020	0.135075	1	0.853096	0.81395
INFERIOROCCIPITALGYRUS_gm_	0.362 ± 0.039	0.395 ± 0.014	0.0231678	1	0.346569	1.13701
MIDDLEOCCIPITALGYRUS_gm_	0.367 ± 0.032	0.394 ± 0.017	0.0551236	1	0.456946	1.04859
ENTORHINALAREA_gm_	0.341 ± 0.033	0.354 ± 0.021	0.195806	1	1	0.503354
SUPERIORTEMPORALGYRUS_gm_	0.366 ± 0.037	0.397 ± 0.013	0.0333059	1	0.370018	1.0994
INFERIORTEMPORALGYRUS_gm_	0.369 ± 0.031	0.403 ± 0.017	0.00402625	0.442887	0.192601	1.33698
MIDDLETEMPORALGYRUS_gm_	0.366 ± 0.031	0.396 ± 0.014	0.0120745	1	0.252635	1.26232
LATERALFRONTO_ORBITALGYRUS_gm_	0.362 ± 0.031	0.395 ± 0.016	0.00696313	0.765944	0.224772	1.37873
MIDDLEFRONTO_ORBITALGYRUS_gm_	0.357 ± 0.027	0.394 ± 0.016	0.000879018	0.096692	0.170858	1.64064
SUPRAMARGINALGYRUS_gm_	0.365 ± 0.034	0.394 ± 0.011	0.0250512	1	0.346569	1.13734
GYRUSRECTUS_gm_	0.354 ± 0.030	0.389 ± 0.017	0.00464061	0.510468	0.192601	1.42989
INSULAR_gm_	0.330 ± 0.025	0.357 ± 0.012	0.00403597	0.443956	0.192601	1.38866
CorticospinalTractLeft	0.512 ± 0.076	0.556 ± 0.024	0.122232	1	0.789135	0.776453
InferiorCerebellarPeduncleLeft	0.478 ± 0.092	0.565 ± 0.033	0.0121742	1	0.252635	1.26906
MedialLemniscusLeft	0.523 ± 0.068	0.566 ± 0.023	0.117483	1	0.775717	0.835241
SuperiorCerebellarPeduncleLeft	0.523 ± 0.085	0.591 ± 0.022	0.0303336	1	0.370018	1.08834
CerebralPeduncleLeft	0.622 ± 0.085	0.659 ± 0.030	0.318307	1	1	0.584117
AnteriorLimbInternalCapsuleLeft	0.569 ± 0.064	0.601 ± 0.017	0.144004	1	0.868845	0.668735
PosteriorLimbInternalCapsuleLeft	0.630 ± 0.053	0.651 ± 0.028	0.249615	1	1	0.502395
PosteriorThalamicRadiationLeft	0.468 ± 0.067	0.527 ± 0.019	0.0202426	1	0.346569	1.19057
AnteriorCoronaRadiataLeft	0.392 ± 0.054	0.439 ± 0.026	0.0337511	1	0.370018	1.11144
SuperiorCoronaRadiataLeft	0.461 ± 0.053	0.500 ± 0.025	0.0425183	1	0.420611	0.938316
PosteriorCoronaRadiataLeft	0.444 ± 0.042	0.498 ± 0.038	0.00314289	0.345718	0.192601	1.33724
CingulumLeft	0.493 ± 0.076	0.542 ± 0.019	0.0684669	1	0.503574	0.882941
CingulumHippocampalLeft	0.447 ± 0.073	0.490 ± 0.022	0.120745	1	0.788296	0.795796
FornixStriaTerminalisLeft	0.453 ± 0.082	0.510 ± 0.053	0.0559657	1	0.456946	0.82558
SuperiorLongitudinalFasciculusLeft	0.417 ± 0.064	0.476 ± 0.020	0.0111226	1	0.252635	1.25014
InferiorFronto_occipitalFasciculusLeft	0.443 ± 0.067	0.498 ± 0.039	0.0618438	1	0.466676	1.00226
SagittalStratumLeft	0.453 ± 0.068	0.513 ± 0.017	0.0166595	1	0.326612	1.21452
ExternalCapsuleLeft	0.390 ± 0.056	0.433 ± 0.026	0.0450456	1	0.420611	0.989659
UncinateFasciculusLeft	0.395 ± 0.071	0.442 ± 0.034	0.0733244	1	0.532561	0.848908
PontineCrossingTractLeft	0.471 ± 0.062	0.514 ± 0.025	0.0247402	1	0.346569	0.910309
MiddleCerebellarPeduncleLeft	0.487 ± 0.076	0.573 ± 0.022	0.00183898	0.202288	0.170858	1.52933
FornixLeft	0.400 ± 0.093	0.420 ± 0.047	0.799803	1	1	0.276947
GenuCorpusCallosumLeft	0.575 ± 0.090	0.641 ± 0.029	0.0604777	1	0.462373	0.983701
BodyCorpusCallosumLeft	0.550 ± 0.093	0.597 ± 0.039	0.218996	1	1	0.664872
SpleniumCorpusCallosumLeft	0.568 ± 0.069	0.618 ± 0.023	0.0600901	1	0.462373	0.986523
RetrolenticularInternalCapsuleLeft	0.517 ± 0.061	0.565 ± 0.027	0.0250369	1	0.346569	1.00253
MIDBRAINLeft	0.432 ± 0.051	0.470 ± 0.019	0.0285268	1	0.368342	0.976076
MEDULLALeft	0.387 ± 0.083	0.461 ± 0.023	0.0108565	1	0.252635	1.21407
SUPERIORPARIETALGYRUSRight_gm_	0.435 ± 0.045	0.456 ± 0.015	0.23921	1	1	0.61526
CINGULATEGYRUSRight_gm_	0.340 ± 0.023	0.360 ± 0.009	0.0227202	1	0.346569	1.13717
SUPERIORFRONTALGYRUSRight_gm_	0.377 ± 0.033	0.402 ± 0.013	0.0584088	1	0.462373	0.993577
MIDDLEFRONTALGYRUSRight_gm_	0.378 ± 0.032	0.405 ± 0.012	0.0316596	1	0.370018	1.12072
INFERIORFRONTALGYRUSRight_gm_	0.386 ± 0.036	0.421 ± 0.013	0.0108269	1	0.252635	1.29755
PRECENTRALGYRUSRight_gm_	0.405 ± 0.037	0.439 ± 0.015	0.0110733	1	0.252635	1.22564
POSTCENTRALGYRUSRight_gm_	0.374 ± 0.039	0.410 ± 0.011	0.011825	1	0.252635	1.25772
ANGULARGYRUSRight_gm_	0.375 ± 0.033	0.394 ± 0.013	0.133467	1	0.8522	0.788782
PRE_CUNEUSRight_gm_	0.355 ± 0.032	0.373 ± 0.018	0.140306	1	0.868836	0.692804
CUNEUSRight_gm_	0.364 ± 0.042	0.397 ± 0.015	0.0335484	1	0.370018	1.04422
LINGUALGYRUSRight_gm_	0.369 ± 0.040	0.406 ± 0.011	0.00745075	0.819583	0.227854	1.26671
FUSIFORMGYRUSRight_gm_	0.355 ± 0.028	0.385 ± 0.013	0.00336373	0.37001	0.192601	1.39306
PARAHIPPOCAMPALGYRUSRight_gm_	0.345 ± 0.034	0.364 ± 0.008	0.116586	1	0.775717	0.767049
SUPERIOROCCIPITALGYRUSRight_gm_	0.403 ± 0.046	0.430 ± 0.015	0.157955	1	0.93652	0.793191
INFERIOROCCIPITALGYRUSRight_gm_	0.362 ± 0.036	0.393 ± 0.010	0.0186481	1	0.338607	1.18118
MIDDLEOCCIPITALGYRUSRight_gm_	0.366 ± 0.039	0.387 ± 0.010	0.256254	1	1	0.722634
ENTORHINALAREARight_gm_	0.341 ± 0.023	0.360 ± 0.023	0.0477765	1	0.420611	0.855304
SUPERIORTEMPORALGYRUSRight_gm_	0.368 ± 0.034	0.399 ± 0.015	0.0214808	1	0.346569	1.18576
INFERIORTEMPORALGYRUSRight_gm_	0.370 ± 0.026	0.402 ± 0.016	0.000594584	0.0654043	0.170858	1.50279
MIDDLETEMPORALGYRUSRight_gm_	0.375 ± 0.028	0.408 ± 0.012	0.00205837	0.226421	0.170858	1.53315
LATERALFRONTO_ORBITALGYRUSRight_gm_	0.362 ± 0.026	0.384 ± 0.018	0.0398211	1	0.420611	0.942763
MIDDLEFRONTO_ORBITALGYRUSRight_gm_	0.360 ± 0.023	0.388 ± 0.023	0.00887785	0.976563	0.24564	1.18603
SUPRAMARGINALGYRUSRight_gm_	0.374 ± 0.033	0.403 ± 0.013	0.0236311	1	0.346569	1.13903
GYRUSRECTUSRight_gm_	0.353 ± 0.026	0.386 ± 0.015	0.00177856	0.195642	0.170858	1.5681
INSULARRight_gm_	0.341 ± 0.030	0.372 ± 0.017	0.00639582	0.703541	0.218604	1.24907
CorticospinalTractRight	0.510 ± 0.055	0.558 ± 0.034	0.0273454	1	0.361112	1.03141
InferiorCerebellarPeduncleRight	0.464 ± 0.076	0.520 ± 0.027	0.0429651	1	0.420611	0.983193
MedialLemniscusRight	0.524 ± 0.068	0.562 ± 0.024	0.103999	1	0.719381	0.755138
SuperiorCerebellarPeduncleRight	0.543 ± 0.096	0.616 ± 0.023	0.0311069	1	0.370018	1.0467
CerebralPeduncleRight	0.626 ± 0.069	0.663 ± 0.026	0.140558	1	0.868836	0.720275
AnteriorLimbInternalCapsuleRight	0.565 ± 0.070	0.610 ± 0.023	0.0471753	1	0.420611	0.869752
PosteriorLimbInternalCapsuleRight	0.620 ± 0.059	0.645 ± 0.031	0.217497	1	1	0.535544
PosteriorThalamicRadiationRight	0.466 ± 0.062	0.512 ± 0.023	0.0516042	1	0.447351	0.964444
AnteriorCoronaRadiataRight	0.398 ± 0.058	0.442 ± 0.021	0.0531235	1	0.447351	1.00643
SuperiorCoronaRadiataRight	0.444 ± 0.054	0.497 ± 0.025	0.0057863	0.636493	0.218604	1.24534
PosteriorCoronaRadiataRight	0.436 ± 0.057	0.481 ± 0.029	0.0248944	1	0.346569	0.990141
CingulumRight	0.438 ± 0.071	0.475 ± 0.022	0.18923	1	1	0.709538
CingulumHippocampalRight	0.424 ± 0.077	0.482 ± 0.016	0.0457117	1	0.420611	1.03693
FornixStriaTerminalisRight	0.464 ± 0.076	0.524 ± 0.035	0.0449067	1	0.420611	1.00403
SuperiorLongitudinalFasciculusRight	0.421 ± 0.064	0.471 ± 0.019	0.0312647	1	0.370018	1.04492
InferiorFronto_occipitalFasciculusRight	0.461 ± 0.071	0.510 ± 0.029	0.0566223	1	0.456946	0.920584
SagittalStratumRight	0.455 ± 0.061	0.506 ± 0.024	0.0221742	1	0.346569	1.11114
ExternalCapsuleRight	0.426 ± 0.060	0.462 ± 0.032	0.06026	1	0.462373	0.759678
UncinateFasciculusRight	0.395 ± 0.050	0.442 ± 0.040	0.0177615	1	0.332911	1.03461
PontineCrossingTractRight	0.462 ± 0.068	0.505 ± 0.028	0.0168633	1	0.326612	0.840151
MiddleCerebellarPeduncleRight	0.497 ± 0.072	0.581 ± 0.025	0.00111154	0.122269	0.170858	1.56278
FornixRight	0.504 ± 0.112	0.534 ± 0.061	0.687755	1	1	0.338135
GenuCorpusCallosumRight	0.575 ± 0.084	0.627 ± 0.033	0.145045	1	0.868845	0.815501
BodyCorpusCallosumRight	0.556 ± 0.087	0.613 ± 0.030	0.0796564	1	0.571408	0.877982
SpleniumCorpusCallosumRight	0.579 ± 0.084	0.633 ± 0.028	0.111315	1	0.752083	0.85704
RetrolenticularInternalCapsuleRight	0.516 ± 0.064	0.553 ± 0.018	0.0915184	1	0.640679	0.78464
MIDBRAINRight	0.412 ± 0.055	0.451 ± 0.018	0.0468155	1	0.420611	0.932344
MEDULLARight	0.406 ± 0.069	0.476 ± 0.018	0.00347642	0.382406	0.192601	1.39473
OpticTractLeft	0.414 ± 0.092	0.453 ± 0.044	0.417735	1	1	0.53033
OpticTractRigh	0.399 ± 0.091	0.467 ± 0.034	0.0359548	1	0.386878	0.986765
SLF_tLeft	0.466 ± 0.077	0.527 ± 0.028	0.0441837	1	0.420611	1.04346
SLFF_tRight	0.467 ± 0.069	0.536 ± 0.025	0.00460695	0.506764	0.192601	1.32332

## Sheet: Axial Diffusivity 
Structures	Controls (mean±SD)	SCA6 (mean±SD)	p-value (Uncorrected)	Bonferroni	FDR	Effect Size (Cohen d)
SUPERIORPARIETALGYRUSLeft_gm_	1.050 ± 0.045	1.062 ± 0.042	0.601073	1	1	0.260788
CINGULATEGYRUSLeft_gm_	0.985 ± 0.057	1.003 ± 0.050	0.144782	1	1	0.346136
SUPERIORFRONTALGYRUSLeft_gm_	1.037 ± 0.049	1.066 ± 0.061	0.0678027	1	0.804009	0.528025
MIDDLEFRONTALGYRUSLeft_gm_	1.040 ± 0.079	1.057 ± 0.094	0.236846	1	1	0.198001
INFERIORFRONTALGYRUSLeft_gm_	1.026 ± 0.041	1.071 ± 0.068	0.00645657	0.710222	0.13386	0.80989
PRECENTRALGYRUSLeft_gm_	1.010 ± 0.035	1.050 ± 0.033	0.00182027	0.20023	0.0488153	1.13948
POSTCENTRALGYRUSLeft_gm_	1.010 ± 0.068	0.986 ± 0.054	0.651766	1	1	0.385341
ANGULARGYRUSLeft_gm_	1.033 ± 0.103	1.040 ± 0.082	0.675629	1	1	0.0760541
PRE_CUNEUSLeft_gm_	0.958 ± 0.115	0.983 ± 0.097	0.438231	1	1	0.23957
CUNEUSLeft_gm_	1.016 ± 0.114	1.025 ± 0.081	0.634371	1	1	0.0920753
LINGUALGYRUSLeft_gm_	1.048 ± 0.066	1.085 ± 0.086	0.142505	1	1	0.486118
FUSIFORMGYRUSLeft_gm_	1.088 ± 0.105	1.116 ± 0.040	0.199158	1	1	0.357991
PARAHIPPOCAMPALGYRUSLeft_gm_	1.299 ± 0.222	1.446 ± 0.102	0.00820294	0.902323	0.148946	0.851561
SUPERIOROCCIPITALGYRUSLeft_gm_	1.012 ± 0.052	0.987 ± 0.052	0.446638	1	1	0.492609
INFERIOROCCIPITALGYRUS_gm_	1.066 ± 0.181	1.018 ± 0.048	0.508778	1	1	0.363313
MIDDLEOCCIPITALGYRUS_gm_	1.097 ± 0.157	1.115 ± 0.074	0.479547	1	1	0.146684
ENTORHINALAREA_gm_	1.145 ± 0.173	1.148 ± 0.145	0.753036	1	1	0.0171772
SUPERIORTEMPORALGYRUS_gm_	1.071 ± 0.078	1.115 ± 0.077	0.0431589	1	0.53356	0.571424
INFERIORTEMPORALGYRUS_gm_	1.195 ± 0.135	1.198 ± 0.053	0.659054	1	1	0.0253354
MIDDLETEMPORALGYRUS_gm_	1.100 ± 0.105	1.101 ± 0.051	0.512792	1	1	0.00352979
LATERALFRONTO_ORBITALGYRUS_gm_	1.163 ± 0.158	1.184 ± 0.092	0.440758	1	1	0.157933
MIDDLEFRONTO_ORBITALGYRUS_gm_	1.211 ± 0.181	1.194 ± 0.080	0.852501	1	1	0.125423
SUPRAMARGINALGYRUS_gm_	1.055 ± 0.070	1.052 ± 0.049	0.779725	1	1	0.0425248
GYRUSRECTUS_gm_	1.045 ± 0.129	1.078 ± 0.067	0.37631	1	1	0.314606
INSULAR_gm_	1.050 ± 0.088	1.128 ± 0.124	0.0165253	1	0.259512	0.729259
CorticospinalTractLeft	1.262 ± 0.065	1.312 ± 0.082	0.0362822	1	0.458296	0.68034
InferiorCerebellarPeduncleLeft	1.325 ± 0.110	1.472 ± 0.065	7.73056e-05	0.00850362	0.00758195	1.61693
MedialLemniscusLeft	1.427 ± 0.063	1.431 ± 0.070	0.577313	1	1	0.0533027
SuperiorCerebellarPeduncleLeft	1.699 ± 0.101	1.852 ± 0.102	0.00017453	0.0191983	0.0107156	1.507
CerebralPeduncleLeft	1.531 ± 0.060	1.633 ± 0.086	0.000610553	0.0671608	0.0236506	1.38202
AnteriorLimbInternalCapsuleLeft	1.124 ± 0.109	1.235 ± 0.102	0.0234539	1	0.332385	1.05259
PosteriorLimbInternalCapsuleLeft	1.277 ± 0.080	1.354 ± 0.056	0.00670363	0.7374	0.13386	1.11246
PosteriorThalamicRadiationLeft	1.231 ± 0.081	1.296 ± 0.036	0.0119357	1	0.203976	1.0409
AnteriorCoronaRadiataLeft	1.103 ± 0.064	1.157 ± 0.061	0.0197403	1	0.301843	0.867906
SuperiorCoronaRadiataLeft	1.059 ± 0.072	1.148 ± 0.044	0.000179836	0.019782	0.0107156	1.47787
PosteriorCoronaRadiataLeft	1.105 ± 0.078	1.179 ± 0.043	0.00148014	0.162815	0.0430014	1.18012
CingulumLeft	1.161 ± 0.093	1.241 ± 0.066	0.0162683	1	0.259512	0.999242
CingulumHippocampalLeft	1.203 ± 0.090	1.293 ± 0.057	0.00612717	0.673989	0.131858	1.19674
FornixStriaTerminalisLeft	1.364 ± 0.118	1.545 ± 0.120	0.000129662	0.0142628	0.0107156	1.5175
SuperiorLongitudinalFasciculusLeft	1.069 ± 0.067	1.140 ± 0.034	0.00105894	0.116484	0.0361938	1.34638
InferiorFronto_occipitalFasciculusLeft	1.149 ± 0.067	1.240 ± 0.072	0.00282242	0.310466	0.0655982	1.3082
SagittalStratumLeft	1.231 ± 0.077	1.337 ± 0.036	7.82928e-05	0.00861221	0.00758195	1.75643
ExternalCapsuleLeft	1.052 ± 0.071	1.116 ± 0.078	0.0230519	1	0.332385	0.853533
UncinateFasciculusLeft	1.170 ± 0.077	1.272 ± 0.110	0.00799032	0.878935	0.148946	1.06955
PontineCrossingTractLeft	1.275 ± 0.062	1.293 ± 0.066	0.0917418	1	0.987151	0.285771
MiddleCerebellarPeduncleLeft	1.165 ± 0.079	1.312 ± 0.061	8.87256e-06	0.000975981	0.00274659	2.09267
FornixLeft	2.352 ± 0.179	2.502 ± 0.202	0.00267935	0.294728	0.0648677	0.781672
GenuCorpusCallosumLeft	1.531 ± 0.105	1.640 ± 0.064	0.000432734	0.0476008	0.0180851	1.25669
BodyCorpusCallosumLeft	1.529 ± 0.109	1.644 ± 0.084	0.00133764	0.14714	0.0412392	1.18853
SpleniumCorpusCallosumLeft	1.553 ± 0.071	1.622 ± 0.049	0.00184828	0.203311	0.0488153	1.14005
RetrolenticularInternalCapsuleLeft	1.252 ± 0.075	1.355 ± 0.092	0.00846727	0.931399	0.149087	1.23238
MIDBRAINLeft	1.210 ± 0.087	1.325 ± 0.078	6.93391e-05	0.0076273	0.00758195	1.39562
MEDULLALeft	1.628 ± 0.168	1.563 ± 0.098	0.245495	1	1	0.473347
SUPERIORPARIETALGYRUSRight_gm_	1.057 ± 0.034	1.069 ± 0.029	0.479835	1	1	0.403209
CINGULATEGYRUSRight_gm_	1.033 ± 0.082	1.102 ± 0.092	0.0344019	1	0.444202	0.793756
SUPERIORFRONTALGYRUSRight_gm_	1.030 ± 0.059	1.058 ± 0.067	0.190455	1	1	0.442657
MIDDLEFRONTALGYRUSRight_gm_	1.055 ± 0.062	1.052 ± 0.057	0.752382	1	1	0.0520205
INFERIORFRONTALGYRUSRight_gm_	1.083 ± 0.073	1.055 ± 0.048	0.306267	1	1	0.455408
PRECENTRALGYRUSRight_gm_	1.019 ± 0.029	1.032 ± 0.030	0.248927	1	1	0.439994
POSTCENTRALGYRUSRight_gm_	0.999 ± 0.077	0.985 ± 0.091	0.500702	1	1	0.16677
ANGULARGYRUSRight_gm_	1.041 ± 0.084	1.032 ± 0.115	0.636892	1	1	0.0902036
PRE_CUNEUSRight_gm_	0.969 ± 0.116	1.029 ± 0.141	0.286207	1	1	0.46626
CUNEUSRight_gm_	1.048 ± 0.145	1.032 ± 0.092	0.813176	1	1	0.130681
LINGUALGYRUSRight_gm_	1.063 ± 0.087	1.067 ± 0.066	0.885106	1	1	0.0481899
FUSIFORMGYRUSRight_gm_	1.095 ± 0.096	1.135 ± 0.085	0.330546	1	1	0.437069
PARAHIPPOCAMPALGYRUSRight_gm_	1.422 ± 0.150	1.586 ± 0.189	0.00691132	0.760245	0.13386	0.963321
SUPERIOROCCIPITALGYRUSRight_gm_	1.034 ± 0.041	1.046 ± 0.047	0.237765	1	1	0.275383
INFERIOROCCIPITALGYRUSRight_gm_	1.105 ± 0.157	1.041 ± 0.042	0.240858	1	1	0.553091
MIDDLEOCCIPITALGYRUSRight_gm_	1.087 ± 0.127	1.093 ± 0.067	0.712878	1	1	0.0546657
ENTORHINALAREARight_gm_	1.325 ± 0.302	1.460 ± 0.244	0.486605	1	1	0.489304
SUPERIORTEMPORALGYRUSRight_gm_	1.076 ± 0.091	1.091 ± 0.108	0.870181	1	1	0.145314
INFERIORTEMPORALGYRUSRight_gm_	1.170 ± 0.155	1.119 ± 0.054	0.311859	1	1	0.44182
MIDDLETEMPORALGYRUSRight_gm_	1.123 ± 0.108	1.078 ± 0.054	0.208338	1	1	0.526189
LATERALFRONTO_ORBITALGYRUSRight_gm_	1.203 ± 0.204	1.131 ± 0.051	0.470609	1	1	0.484775
MIDDLEFRONTO_ORBITALGYRUSRight_gm_	1.256 ± 0.190	1.212 ± 0.063	0.864749	1	1	0.312679
SUPRAMARGINALGYRUSRight_gm_	1.062 ± 0.038	1.058 ± 0.061	0.417657	1	1	0.0721577
GYRUSRECTUSRight_gm_	1.098 ± 0.162	1.151 ± 0.079	0.190418	1	1	0.418122
INSULARRight_gm_	1.077 ± 0.094	1.054 ± 0.095	0.439908	1	1	0.249557
CorticospinalTractRight	1.195 ± 0.070	1.280 ± 0.075	0.00239113	0.263024	0.0604067	1.17583
InferiorCerebellarPeduncleRight	1.340 ± 0.067	1.437 ± 0.092	0.00134851	0.148336	0.0412392	1.19516
MedialLemniscusRight	1.446 ± 0.086	1.424 ± 0.076	0.527826	1	1	0.270471
SuperiorCerebellarPeduncleRight	1.779 ± 0.109	1.835 ± 0.076	0.236983	1	1	0.59422
CerebralPeduncleRight	1.424 ± 0.048	1.519 ± 0.065	0.000202861	0.0223147	0.0107156	1.6387
AnteriorLimbInternalCapsuleRight	1.105 ± 0.096	1.168 ± 0.077	0.13788	1	1	0.728664
PosteriorLimbInternalCapsuleRight	1.201 ± 0.087	1.275 ± 0.068	0.0334009	1	0.444202	0.94485
PosteriorThalamicRadiationRight	1.253 ± 0.075	1.290 ± 0.049	0.188854	1	1	0.585116
AnteriorCoronaRadiataRight	1.137 ± 0.074	1.165 ± 0.051	0.257485	1	1	0.440162
SuperiorCoronaRadiataRight	1.061 ± 0.072	1.127 ± 0.031	0.00439621	0.483583	0.0982462	1.1797
PosteriorCoronaRadiataRight	1.131 ± 0.072	1.172 ± 0.035	0.0715047	1	0.83095	0.722962
CingulumRight	1.105 ± 0.056	1.131 ± 0.043	0.204815	1	1	0.525964
CingulumHippocampalRight	1.154 ± 0.056	1.183 ± 0.054	0.237055	1	1	0.533796
FornixStriaTerminalisRight	1.357 ± 0.071	1.469 ± 0.098	5.95924e-05	0.00655516	0.00758195	1.30056
SuperiorLongitudinalFasciculusRight	1.054 ± 0.059	1.087 ± 0.024	0.0915599	1	0.987151	0.74904
InferiorFronto_occipitalFasciculusRight	1.144 ± 0.089	1.188 ± 0.054	0.285618	1	1	0.586044
SagittalStratumRight	1.209 ± 0.044	1.245 ± 0.051	0.0317609	1	0.439393	0.751785
ExternalCapsuleRight	1.012 ± 0.083	1.044 ± 0.055	0.358542	1	1	0.456078
UncinateFasciculusRight	1.135 ± 0.069	1.243 ± 0.273	0.291397	1	1	0.543023
PontineCrossingTractRight	1.279 ± 0.059	1.302 ± 0.102	0.126211	1	1	0.27046
MiddleCerebellarPeduncleRight	1.158 ± 0.063	1.276 ± 0.050	9.45395e-06	0.00103993	0.00274659	2.07901
FornixRight	1.929 ± 0.159	2.084 ± 0.210	0.0227274	1	0.332385	0.833
GenuCorpusCallosumRight	1.633 ± 0.099	1.676 ± 0.058	0.0887944	1	0.987151	0.533017
BodyCorpusCallosumRight	1.530 ± 0.076	1.636 ± 0.063	0.000350987	0.0386085	0.0169949	1.51157
SpleniumCorpusCallosumRight	1.550 ± 0.081	1.612 ± 0.052	0.0142526	1	0.236612	0.917758
RetrolenticularInternalCapsuleRight	1.210 ± 0.058	1.249 ± 0.061	0.0336414	1	0.444202	0.65997
MIDBRAINRight	1.283 ± 0.086	1.394 ± 0.097	0.00043575	0.0479325	0.0180851	1.20425
MEDULLARight	1.524 ± 0.106	1.515 ± 0.110	0.71304	1	1	0.0858702
OpticTractLeft	1.794 ± 0.142	1.968 ± 0.187	0.000199547	0.0219502	0.0107156	1.04939
OpticTractRigh	1.800 ± 0.163	1.993 ± 0.130	0.000728395	0.0801234	0.0264519	1.3108
SLF_tLeft	1.132 ± 0.086	1.188 ± 0.047	0.0482536	1	0.584116	0.812189
SLFF_tRight	1.164 ± 0.079	1.203 ± 0.036	0.0841888	1	0.959167	0.632477

## Sheet: Radial Diffusivity 
Structures	Control (mean±SD)	SCA6 (mean±SD)	p-value (Uncorrected)	Bonferroni	FDR	Effect Size (Cohen d)
SUPERIORPARIETALGYRUSLeft_gm_	0.532 ± 0.053	0.512 ± 0.039	0.439691	1	1	0.442473
CINGULATEGYRUSLeft_gm_	0.587 ± 0.046	0.577 ± 0.030	0.961827	1	1	0.267539
SUPERIORFRONTALGYRUSLeft_gm_	0.586 ± 0.048	0.585 ± 0.043	0.628106	1	1	0.0268248
MIDDLEFRONTALGYRUSLeft_gm_	0.597 ± 0.069	0.587 ± 0.067	0.764866	1	1	0.158321
INFERIORFRONTALGYRUSLeft_gm_	0.566 ± 0.045	0.566 ± 0.051	0.44883	1	1	0.00240354
PRECENTRALGYRUSLeft_gm_	0.528 ± 0.039	0.522 ± 0.025	0.76071	1	1	0.176725
POSTCENTRALGYRUSLeft_gm_	0.563 ± 0.070	0.525 ± 0.040	0.255647	1	1	0.661077
ANGULARGYRUSLeft_gm_	0.572 ± 0.086	0.553 ± 0.058	0.850849	1	1	0.254508
PRE_CUNEUSLeft_gm_	0.561 ± 0.082	0.566 ± 0.066	0.648458	1	1	0.066328
CUNEUSLeft_gm_	0.579 ± 0.099	0.555 ± 0.053	0.639309	1	1	0.290261
LINGUALGYRUSLeft_gm_	0.597 ± 0.053	0.594 ± 0.058	0.85003	1	1	0.0527343
FUSIFORMGYRUSLeft_gm_	0.647 ± 0.080	0.636 ± 0.029	0.950269	1	1	0.195391
PARAHIPPOCAMPALGYRUSLeft_gm_	0.772 ± 0.155	0.827 ± 0.062	0.0794971	1	1	0.465866
SUPERIOROCCIPITALGYRUSLeft_gm_	0.545 ± 0.057	0.510 ± 0.035	0.186225	1	1	0.753627
INFERIOROCCIPITALGYRUS_gm_	0.627 ± 0.141	0.566 ± 0.035	0.249073	1	1	0.595854
MIDDLEOCCIPITALGYRUS_gm_	0.634 ± 0.118	0.615 ± 0.049	0.907262	1	1	0.211269
ENTORHINALAREA_gm_	0.695 ± 0.107	0.692 ± 0.100	0.882462	1	1	0.026573
SUPERIORTEMPORALGYRUS_gm_	0.626 ± 0.071	0.628 ± 0.055	0.475363	1	1	0.0199524
INFERIORTEMPORALGYRUS_gm_	0.698 ± 0.101	0.665 ± 0.031	0.4228	1	1	0.444145
MIDDLETEMPORALGYRUS_gm_	0.642 ± 0.089	0.612 ± 0.039	0.621826	1	1	0.437761
LATERALFRONTO_ORBITALGYRUS_gm_	0.687 ± 0.117	0.665 ± 0.055	0.862851	1	1	0.24087
MIDDLEFRONTO_ORBITALGYRUS_gm_	0.725 ± 0.120	0.677 ± 0.043	0.369182	1	1	0.53632
SUPRAMARGINALGYRUS_gm_	0.615 ± 0.065	0.590 ± 0.039	0.495664	1	1	0.459002
GYRUSRECTUS_gm_	0.631 ± 0.095	0.618 ± 0.033	0.829	1	1	0.181208
INSULAR_gm_	0.655 ± 0.057	0.686 ± 0.081	0.0736982	1	1	0.442111
CorticospinalTractLeft	0.560 ± 0.079	0.537 ± 0.048	0.785154	1	1	0.349972
InferiorCerebellarPeduncleLeft	0.631 ± 0.089	0.615 ± 0.067	0.841763	1	1	0.202546
MedialLemniscusLeft	0.606 ± 0.072	0.567 ± 0.046	0.388139	1	1	0.641263
SuperiorCerebellarPeduncleLeft	0.736 ± 0.107	0.719 ± 0.068	0.849123	1	1	0.186162
CerebralPeduncleLeft	0.532 ± 0.105	0.525 ± 0.060	0.670646	1	1	0.0888565
AnteriorLimbInternalCapsuleLeft	0.425 ± 0.047	0.439 ± 0.061	0.659453	1	1	0.257058
PosteriorLimbInternalCapsuleLeft	0.410 ± 0.041	0.420 ± 0.050	0.548378	1	1	0.20759
PosteriorThalamicRadiationLeft	0.574 ± 0.054	0.535 ± 0.031	0.1105	1	1	0.889485
AnteriorCoronaRadiataLeft	0.603 ± 0.047	0.588 ± 0.055	0.913936	1	1	0.29871
SuperiorCoronaRadiataLeft	0.511 ± 0.035	0.520 ± 0.040	0.312711	1	1	0.232375
PosteriorCoronaRadiataLeft	0.549 ± 0.033	0.532 ± 0.046	0.386099	1	1	0.428526
CingulumLeft	0.514 ± 0.054	0.499 ± 0.033	0.704995	1	1	0.34959
CingulumHippocampalLeft	0.588 ± 0.065	0.587 ± 0.043	0.593512	1	1	0.00822382
FornixStriaTerminalisLeft	0.676 ± 0.101	0.689 ± 0.112	0.65013	1	1	0.116007
SuperiorLongitudinalFasciculusLeft	0.568 ± 0.041	0.546 ± 0.032	0.400879	1	1	0.584087
InferiorFronto_occipitalFasciculusLeft	0.573 ± 0.065	0.555 ± 0.065	0.902625	1	1	0.276872
SagittalStratumLeft	0.599 ± 0.056	0.581 ± 0.033	0.803918	1	1	0.397107
ExternalCapsuleLeft	0.584 ± 0.049	0.580 ± 0.064	0.893231	1	1	0.080812
UncinateFasciculusLeft	0.632 ± 0.070	0.633 ± 0.088	0.743597	1	1	0.0128253
PontineCrossingTractLeft	0.623 ± 0.073	0.588 ± 0.049	0.307302	1	1	0.558048
MiddleCerebellarPeduncleLeft	0.528 ± 0.063	0.502 ± 0.046	0.612581	1	1	0.479334
FornixLeft	1.294 ± 0.247	1.337 ± 0.197	0.231502	1	1	0.19062
GenuCorpusCallosumLeft	0.574 ± 0.103	0.532 ± 0.056	0.607769	1	1	0.502446
BodyCorpusCallosumLeft	0.603 ± 0.131	0.587 ± 0.093	0.861224	1	1	0.134172
SpleniumCorpusCallosumLeft	0.589 ± 0.085	0.554 ± 0.052	0.554667	1	1	0.494714
RetrolenticularInternalCapsuleLeft	0.534 ± 0.058	0.523 ± 0.060	0.640276	1	1	0.18349
MIDBRAINLeft	0.640 ± 0.061	0.658 ± 0.042	0.0899063	1	1	0.343526
MEDULLALeft	0.933 ± 0.211	0.799 ± 0.059	0.0656809	1	1	0.869378
SUPERIORPARIETALGYRUSRight_gm_	0.537 ± 0.044	0.526 ± 0.025	0.53251	1	1	0.325227
CINGULATEGYRUSRight_gm_	0.636 ± 0.056	0.664 ± 0.056	0.117674	1	1	0.509423
SUPERIORFRONTALGYRUSRight_gm_	0.591 ± 0.047	0.588 ± 0.047	0.836411	1	1	0.0784059
MIDDLEFRONTALGYRUSRight_gm_	0.601 ± 0.058	0.576 ± 0.043	0.486384	1	1	0.489515
INFERIORFRONTALGYRUSRight_gm_	0.609 ± 0.067	0.564 ± 0.034	0.0811074	1	1	0.848663
PRECENTRALGYRUSRight_gm_	0.555 ± 0.038	0.531 ± 0.025	0.104824	1	1	0.756287
POSTCENTRALGYRUSRight_gm_	0.588 ± 0.068	0.554 ± 0.058	0.1894	1	1	0.531531
ANGULARGYRUSRight_gm_	0.593 ± 0.071	0.573 ± 0.077	0.425987	1	1	0.278258
PRE_CUNEUSRight_gm_	0.584 ± 0.085	0.614 ± 0.092	0.41408	1	1	0.337367
CUNEUSRight_gm_	0.615 ± 0.119	0.576 ± 0.058	0.419232	1	1	0.410134
LINGUALGYRUSRight_gm_	0.616 ± 0.076	0.588 ± 0.042	0.247357	1	1	0.460867
FUSIFORMGYRUSRight_gm_	0.656 ± 0.069	0.652 ± 0.050	0.911425	1	1	0.0578578
PARAHIPPOCAMPALGYRUSRight_gm_	0.873 ± 0.094	0.944 ± 0.107	0.03603	1	1	0.695345
SUPERIOROCCIPITALGYRUSRight_gm_	0.562 ± 0.051	0.544 ± 0.038	0.683221	1	1	0.389326
INFERIOROCCIPITALGYRUSRight_gm_	0.649 ± 0.129	0.576 ± 0.030	0.102377	1	1	0.77796
MIDDLEOCCIPITALGYRUSRight_gm_	0.628 ± 0.108	0.609 ± 0.042	0.805764	1	1	0.239774
ENTORHINALAREARight_gm_	0.804 ± 0.180	0.878 ± 0.154	0.515986	1	1	0.439166
SUPERIORTEMPORALGYRUSRight_gm_	0.633 ± 0.073	0.615 ± 0.064	0.53181	1	1	0.264602
INFERIORTEMPORALGYRUSRight_gm_	0.685 ± 0.110	0.621 ± 0.027	0.0654854	1	1	0.784384
MIDDLETEMPORALGYRUSRight_gm_	0.644 ± 0.086	0.586 ± 0.034	0.0457083	1	1	0.902659
LATERALFRONTO_ORBITALGYRUSRight_gm_	0.711 ± 0.139	0.648 ± 0.031	0.253443	1	1	0.627485
MIDDLEFRONTO_ORBITALGYRUSRight_gm_	0.744 ± 0.122	0.694 ± 0.035	0.338512	1	1	0.563404
SUPRAMARGINALGYRUSRight_gm_	0.611 ± 0.045	0.579 ± 0.042	0.0526615	1	1	0.741061
GYRUSRECTUSRight_gm_	0.663 ± 0.106	0.664 ± 0.045	0.780761	1	1	0.00416073
INSULARRight_gm_	0.658 ± 0.067	0.620 ± 0.055	0.132796	1	1	0.626926
CorticospinalTractRight	0.531 ± 0.046	0.518 ± 0.042	0.827476	1	1	0.300037
InferiorCerebellarPeduncleRight	0.659 ± 0.089	0.652 ± 0.076	0.996585	1	1	0.0866848
MedialLemniscusRight	0.620 ± 0.099	0.569 ± 0.045	0.164409	1	1	0.659039
SuperiorCerebellarPeduncleRight	0.746 ± 0.157	0.677 ± 0.056	0.274378	1	1	0.584533
CerebralPeduncleRight	0.485 ± 0.077	0.473 ± 0.052	0.969417	1	1	0.178071
AnteriorLimbInternalCapsuleRight	0.426 ± 0.050	0.407 ± 0.043	0.278996	1	1	0.413516
PosteriorLimbInternalCapsuleRight	0.397 ± 0.044	0.401 ± 0.057	0.934825	1	1	0.0821652
PosteriorThalamicRadiationRight	0.587 ± 0.051	0.556 ± 0.044	0.152979	1	1	0.636566
AnteriorCoronaRadiataRight	0.617 ± 0.061	0.586 ± 0.037	0.283746	1	1	0.614024
SuperiorCoronaRadiataRight	0.530 ± 0.040	0.513 ± 0.031	0.183725	1	1	0.494013
PosteriorCoronaRadiataRight	0.570 ± 0.047	0.545 ± 0.038	0.10636	1	1	0.593841
CingulumRight	0.552 ± 0.061	0.529 ± 0.035	0.525595	1	1	0.464759
CingulumHippocampalRight	0.592 ± 0.063	0.551 ± 0.026	0.123991	1	1	0.853733
FornixStriaTerminalisRight	0.660 ± 0.080	0.641 ± 0.080	0.977998	1	1	0.234947
SuperiorLongitudinalFasciculusRight	0.555 ± 0.043	0.525 ± 0.026	0.0578882	1	1	0.863106
InferiorFronto_occipitalFasciculusRight	0.546 ± 0.071	0.516 ± 0.044	0.257462	1	1	0.508031
SagittalStratumRight	0.596 ± 0.060	0.559 ± 0.046	0.1726	1	1	0.696809
ExternalCapsuleRight	0.530 ± 0.048	0.518 ± 0.050	0.357048	1	1	0.232899
UncinateFasciculusRight	0.618 ± 0.040	0.627 ± 0.168	0.991476	1	1	0.0714278
PontineCrossingTractRight	0.641 ± 0.088	0.606 ± 0.059	0.279066	1	1	0.465017
MiddleCerebellarPeduncleRight	0.511 ± 0.059	0.473 ± 0.032	0.126525	1	1	0.803689
FornixRight	0.890 ± 0.182	0.923 ± 0.184	0.403286	1	1	0.182047
GenuCorpusCallosumRight	0.620 ± 0.113	0.572 ± 0.064	0.472923	1	1	0.524658
BodyCorpusCallosumRight	0.597 ± 0.129	0.559 ± 0.064	0.584912	1	1	0.380534
SpleniumCorpusCallosumRight	0.569 ± 0.106	0.521 ± 0.046	0.369957	1	1	0.583709
RetrolenticularInternalCapsuleRight	0.522 ± 0.057	0.501 ± 0.036	0.429265	1	1	0.456948
MIDBRAINRight	0.710 ± 0.081	0.733 ± 0.067	0.191284	1	1	0.311892
MEDULLARight	0.839 ± 0.139	0.744 ± 0.053	0.0586794	1	1	0.897992
OpticTractLeft	0.959 ± 0.139	1.003 ± 0.165	0.0666602	1	1	0.285711
OpticTractRigh	0.991 ± 0.155	0.993 ± 0.113	0.716103	1	1	0.0180657
SLF_tLeft	0.530 ± 0.053	0.496 ± 0.040	0.270287	1	1	0.708418
SLFF_tRight	0.540 ± 0.046	0.488 ± 0.034	0.0055389	0.609279	1	1.28972

## Sheet: Mean Diffusivity 
Structures	Control (mean±SD)	SCA6 (mean±SD)	p-value (Uncorrected)	Bonferroni	FDR	Effect Size (Cohen d)
SUPERIORPARIETALGYRUSLeft_gm_	0.705 ± 0.047	0.695 ± 0.039	0.709145	1	1	0.227915
CINGULATEGYRUSLeft_gm_	0.720 ± 0.048	0.719 ± 0.036	0.508612	1	1	0.0161769
SUPERIORFRONTALGYRUSLeft_gm_	0.737 ± 0.047	0.746 ± 0.048	0.307213	1	1	0.185904
MIDDLEFRONTALGYRUSLeft_gm_	0.745 ± 0.071	0.743 ± 0.076	0.512533	1	1	0.0195756
INFERIORFRONTALGYRUSLeft_gm_	0.720 ± 0.040	0.735 ± 0.056	0.109004	1	1	0.308999
PRECENTRALGYRUSLeft_gm_	0.689 ± 0.033	0.698 ± 0.027	0.121547	1	1	0.308532
POSTCENTRALGYRUSLeft_gm_	0.712 ± 0.069	0.679 ± 0.044	0.360054	1	1	0.573551
ANGULARGYRUSLeft_gm_	0.726 ± 0.091	0.716 ± 0.066	0.95999	1	1	0.128322
PRE_CUNEUSLeft_gm_	0.693 ± 0.093	0.705 ± 0.076	0.554194	1	1	0.139019
CUNEUSLeft_gm_	0.724 ± 0.104	0.712 ± 0.062	0.915698	1	1	0.144514
LINGUALGYRUSLeft_gm_	0.747 ± 0.054	0.758 ± 0.067	0.464099	1	1	0.17042
FUSIFORMGYRUSLeft_gm_	0.794 ± 0.088	0.796 ± 0.033	0.628228	1	1	0.0240992
PARAHIPPOCAMPALGYRUSLeft_gm_	0.947 ± 0.175	1.033 ± 0.074	0.030601	1	1	0.636841
SUPERIOROCCIPITALGYRUSLeft_gm_	0.701 ± 0.052	0.669 ± 0.040	0.236611	1	1	0.700272
INFERIOROCCIPITALGYRUS_gm_	0.773 ± 0.153	0.717 ± 0.039	0.335318	1	1	0.506565
MIDDLEOCCIPITALGYRUS_gm_	0.788 ± 0.130	0.781 ± 0.056	0.825338	1	1	0.0665442
ENTORHINALAREA_gm_	0.845 ± 0.128	0.844 ± 0.114	0.824028	1	1	0.00759608
SUPERIORTEMPORALGYRUS_gm_	0.775 ± 0.072	0.790 ± 0.062	0.213974	1	1	0.231506
INFERIORTEMPORALGYRUS_gm_	0.864 ± 0.111	0.843 ± 0.037	0.758775	1	1	0.257898
MIDDLETEMPORALGYRUS_gm_	0.795 ± 0.094	0.775 ± 0.043	0.947894	1	1	0.275331
LATERALFRONTO_ORBITALGYRUS_gm_	0.846 ± 0.130	0.838 ± 0.066	0.824295	1	1	0.0764856
MIDDLEFRONTO_ORBITALGYRUS_gm_	0.887 ± 0.139	0.849 ± 0.054	0.664479	1	1	0.359523
SUPRAMARGINALGYRUS_gm_	0.761 ± 0.065	0.744 ± 0.042	0.73558	1	1	0.31273
GYRUSRECTUS_gm_	0.769 ± 0.105	0.771 ± 0.043	0.799302	1	1	0.0280348
INSULAR_gm_	0.786 ± 0.067	0.833 ± 0.095	0.0384028	1	1	0.569875
CorticospinalTractLeft	0.794 ± 0.046	0.796 ± 0.054	0.325297	1	1	0.0300357
InferiorCerebellarPeduncleLeft	0.862 ± 0.065	0.900 ± 0.064	0.0306419	1	1	0.589405
MedialLemniscusLeft	0.880 ± 0.046	0.855 ± 0.049	0.610546	1	1	0.519535
SuperiorCerebellarPeduncleLeft	1.057 ± 0.064	1.097 ± 0.076	0.0386802	1	1	0.570008
CerebralPeduncleLeft	0.865 ± 0.065	0.894 ± 0.061	0.0775038	1	1	0.459875
AnteriorLimbInternalCapsuleLeft	0.658 ± 0.051	0.705 ± 0.074	0.127293	1	1	0.734095
PosteriorLimbInternalCapsuleLeft	0.699 ± 0.033	0.731 ± 0.049	0.054517	1	1	0.765194
PosteriorThalamicRadiationLeft	0.793 ± 0.031	0.789 ± 0.031	0.719129	1	1	0.140099
AnteriorCoronaRadiataLeft	0.770 ± 0.039	0.778 ± 0.056	0.319851	1	1	0.164462
SuperiorCoronaRadiataLeft	0.694 ± 0.033	0.729 ± 0.039	0.00280225	0.308247	0.732438	0.975479
PosteriorCoronaRadiataLeft	0.734 ± 0.040	0.748 ± 0.040	0.235076	1	1	0.334934
CingulumLeft	0.730 ± 0.032	0.746 ± 0.040	0.119802	1	1	0.44722
CingulumHippocampalLeft	0.793 ± 0.050	0.823 ± 0.045	0.0514012	1	1	0.627662
FornixStriaTerminalisLeft	0.906 ± 0.083	0.974 ± 0.110	0.0421256	1	1	0.703016
SuperiorLongitudinalFasciculusLeft	0.735 ± 0.027	0.744 ± 0.031	0.0941975	1	1	0.332636
InferiorFronto_occipitalFasciculusLeft	0.765 ± 0.048	0.783 ± 0.064	0.226826	1	1	0.325744
SagittalStratumLeft	0.810 ± 0.037	0.833 ± 0.033	0.0118378	1	1	0.664017
ExternalCapsuleLeft	0.740 ± 0.045	0.758 ± 0.068	0.254577	1	1	0.314152
UncinateFasciculusLeft	0.812 ± 0.052	0.846 ± 0.093	0.161751	1	1	0.45676
PontineCrossingTractLeft	0.840 ± 0.053	0.823 ± 0.051	0.872697	1	1	0.327566
MiddleCerebellarPeduncleLeft	0.741 ± 0.040	0.772 ± 0.049	0.0168879	1	1	0.708788
FornixLeft	1.647 ± 0.211	1.725 ± 0.195	0.0665062	1	1	0.384867
GenuCorpusCallosumLeft	0.893 ± 0.064	0.902 ± 0.050	0.112517	1	1	0.147687
BodyCorpusCallosumLeft	0.911 ± 0.091	0.940 ± 0.088	0.15365	1	1	0.315111
SpleniumCorpusCallosumLeft	0.910 ± 0.051	0.910 ± 0.050	0.408724	1	1	0.00172307
RetrolenticularInternalCapsuleLeft	0.774 ± 0.042	0.801 ± 0.069	0.310909	1	1	0.474142
MIDBRAINLeft	0.830 ± 0.058	0.880 ± 0.052	0.00156377	0.172014	0.732438	0.918187
MEDULLALeft	1.165 ± 0.193	1.054 ± 0.068	0.0941978	1	1	0.771052
SUPERIORPARIETALGYRUSRight_gm_	0.710 ± 0.036	0.707 ± 0.025	0.80554	1	1	0.11481
CINGULATEGYRUSRight_gm_	0.768 ± 0.064	0.810 ± 0.068	0.068678	1	1	0.638269
SUPERIORFRONTALGYRUSRight_gm_	0.738 ± 0.049	0.745 ± 0.053	0.501029	1	1	0.133439
MIDDLEFRONTALGYRUSRight_gm_	0.752 ± 0.059	0.735 ± 0.047	0.744237	1	1	0.332555
INFERIORFRONTALGYRUSRight_gm_	0.767 ± 0.068	0.728 ± 0.038	0.129337	1	1	0.720079
PRECENTRALGYRUSRight_gm_	0.710 ± 0.031	0.698 ± 0.025	0.40233	1	1	0.41047
POSTCENTRALGYRUSRight_gm_	0.725 ± 0.070	0.698 ± 0.069	0.283388	1	1	0.39021
ANGULARGYRUSRight_gm_	0.742 ± 0.075	0.726 ± 0.089	0.50219	1	1	0.203582
PRE_CUNEUSRight_gm_	0.712 ± 0.095	0.752 ± 0.108	0.355383	1	1	0.39287
CUNEUSRight_gm_	0.759 ± 0.128	0.728 ± 0.069	0.558428	1	1	0.30127
LINGUALGYRUSRight_gm_	0.765 ± 0.078	0.748 ± 0.050	0.431048	1	1	0.269684
FUSIFORMGYRUSRight_gm_	0.802 ± 0.077	0.813 ± 0.061	0.722143	1	1	0.155997
PARAHIPPOCAMPALGYRUSRight_gm_	1.056 ± 0.109	1.158 ± 0.134	0.0161207	1	1	0.829408
SUPERIOROCCIPITALGYRUSRight_gm_	0.719 ± 0.044	0.711 ± 0.041	0.898249	1	1	0.180407
INFERIOROCCIPITALGYRUSRight_gm_	0.801 ± 0.138	0.731 ± 0.034	0.142296	1	1	0.695657
MIDDLEOCCIPITALGYRUSRight_gm_	0.781 ± 0.114	0.770 ± 0.050	0.992142	1	1	0.127914
ENTORHINALAREARight_gm_	0.978 ± 0.220	1.072 ± 0.183	0.501277	1	1	0.463352
SUPERIORTEMPORALGYRUSRight_gm_	0.781 ± 0.077	0.773 ± 0.078	0.762319	1	1	0.0935306
INFERIORTEMPORALGYRUSRight_gm_	0.846 ± 0.124	0.787 ± 0.035	0.130288	1	1	0.64789
MIDDLETEMPORALGYRUSRight_gm_	0.804 ± 0.092	0.750 ± 0.040	0.0840751	1	1	0.76096
LATERALFRONTO_ORBITALGYRUSRight_gm_	0.875 ± 0.160	0.809 ± 0.036	0.33062	1	1	0.569998
MIDDLEFRONTO_ORBITALGYRUSRight_gm_	0.915 ± 0.144	0.866 ± 0.042	0.532512	1	1	0.457622
SUPRAMARGINALGYRUSRight_gm_	0.761 ± 0.041	0.738 ± 0.048	0.109557	1	1	0.514583
GYRUSRECTUSRight_gm_	0.808 ± 0.124	0.826 ± 0.056	0.459581	1	1	0.18718
INSULARRight_gm_	0.798 ± 0.074	0.765 ± 0.068	0.226684	1	1	0.469764
CorticospinalTractRight	0.752 ± 0.036	0.772 ± 0.044	0.0701667	1	1	0.4853
InferiorCerebellarPeduncleRight	0.886 ± 0.066	0.914 ± 0.080	0.266876	1	1	0.373255
MedialLemniscusRight	0.895 ± 0.082	0.854 ± 0.050	0.20243	1	1	0.607071
SuperiorCerebellarPeduncleRight	1.091 ± 0.114	1.063 ± 0.059	0.615467	1	1	0.300817
CerebralPeduncleRight	0.798 ± 0.044	0.822 ± 0.053	0.118926	1	1	0.488096
AnteriorLimbInternalCapsuleRight	0.652 ± 0.045	0.660 ± 0.052	0.87395	1	1	0.171733
PosteriorLimbInternalCapsuleRight	0.665 ± 0.035	0.692 ± 0.058	0.241121	1	1	0.568085
PosteriorThalamicRadiationRight	0.809 ± 0.033	0.801 ± 0.045	0.564653	1	1	0.201675
AnteriorCoronaRadiataRight	0.790 ± 0.053	0.779 ± 0.039	0.796594	1	1	0.243197
SuperiorCoronaRadiataRight	0.707 ± 0.037	0.717 ± 0.027	0.339859	1	1	0.310147
PosteriorCoronaRadiataRight	0.757 ± 0.041	0.754 ± 0.034	0.729002	1	1	0.0904061
CingulumRight	0.736 ± 0.035	0.730 ± 0.034	0.982708	1	1	0.191823
CingulumHippocampalRight	0.779 ± 0.034	0.761 ± 0.034	0.408374	1	1	0.517672
FornixStriaTerminalisRight	0.892 ± 0.051	0.917 ± 0.083	0.0638528	1	1	0.356058
SuperiorLongitudinalFasciculusRight	0.721 ± 0.026	0.712 ± 0.024	0.313049	1	1	0.36902
InferiorFronto_occipitalFasciculusRight	0.745 ± 0.060	0.740 ± 0.045	0.700122	1	1	0.103921
SagittalStratumRight	0.801 ± 0.036	0.788 ± 0.047	0.683098	1	1	0.30559
ExternalCapsuleRight	0.690 ± 0.048	0.694 ± 0.050	0.835843	1	1	0.0632971
UncinateFasciculusRight	0.791 ± 0.037	0.832 ± 0.202	0.63164	1	1	0.288265
PontineCrossingTractRight	0.854 ± 0.066	0.838 ± 0.069	0.819761	1	1	0.232673
MiddleCerebellarPeduncleRight	0.727 ± 0.034	0.741 ± 0.032	0.141565	1	1	0.419429
FornixRight	1.236 ± 0.146	1.310 ± 0.188	0.159838	1	1	0.440106
GenuCorpusCallosumRight	0.958 ± 0.080	0.940 ± 0.058	0.954136	1	1	0.256086
BodyCorpusCallosumRight	0.908 ± 0.089	0.918 ± 0.061	0.424848	1	1	0.122441
SpleniumCorpusCallosumRight	0.896 ± 0.067	0.885 ± 0.041	0.910063	1	1	0.198325
RetrolenticularInternalCapsuleRight	0.751 ± 0.035	0.750 ± 0.043	0.701788	1	1	0.0365286
MIDBRAINRight	0.901 ± 0.073	0.953 ± 0.076	0.0207997	1	1	0.700068
MEDULLARight	1.067 ± 0.122	1.001 ± 0.069	0.141136	1	1	0.668236
OpticTractLeft	1.238 ± 0.106	1.325 ± 0.170	0.00378165	0.415982	0.732438	0.613795
OpticTractRigh	1.261 ± 0.128	1.327 ± 0.114	0.0820975	1	1	0.544818
SLF_tLeft	0.730 ± 0.033	0.727 ± 0.040	0.700985	1	1	0.0980616
SLFF_tRight	0.748 ± 0.021	0.726 ± 0.031	0.0420043	1	1	0.823462
